# Supplementary material for: Stronger Spring Phenological Advance in Future Warming Scenarios for Temperate Species With a Lower Chilling Sensitivity
Source: Front Plant Sci. 2022 May 18;13:830573. doi: 10.3389/fpls.2022.830573 (PMC9158521; doi:10.3389/fpls.2022.830573)
Supplement: Supplementary file 1 [file Data_Sheet_1.xlsx]

## Sheet: Sheet1
Sampling date	Jasminum nudiflorum		Cotoneaster horizontalis		Syringaoblata		Salix babylonica		Viburnum dilatatum		Lespedeza bicolor		Forsythia suspensa		Amygdalus triloba		Populus simonii		Malus micromalus		Cerasus tomentosa		Ginkgo biloba		Metasequoia glyptostroboi		Fraxinus chinensis
	CA (h)	FR (°C h)	CA (h)	FR (°C h)	CA (h)	FR (°C h)	CA (h)	FR (°C h)	CA (h)	FR (°C h)	CA (h)	FR (°C h)	CA (h)	FR (°C h)	CA (h)	FR (°C h)	CA (h)	FR (°C h)	CA (h)	FR (°C h)	CA (h)	FR (°C h)	CA (h)	FR (°C h)	CA (h)	FR (°C h)	CA (h)	FR (°C h)
2018-11-01	7	4813.33	5.7681	NA	8.62668	NA	7	NA	9	NA	7	NA	8.62668	13173.3	7	19760	5.7681	NA	8.16477	NA	8.62668	NA	9	NA	9	NA	7	NA
2018-11-05	26	5066.67	22.6683	NA	49.0602	NA	26	NA	38	NA	26	NA	49.0602	11526.7	26	21280	22.6683	NA	36.2923	NA	49.0602	NA	38	NA	38	NA	26	NA
2018-11-08	55	5066.67	44.8237	NA	84.9303	NA	55	11970	75	NA	55	NA	84.9303	11653.3	55	19000	44.8237	NA	66.2552	NA	84.9303	NA	75	NA	75	18240	55	NA
2018-11-12	73	3800	63.7642	NA	122.679	NA	73	9690	111	NA	73	NA	122.679	11906.7	73	15010	63.7642	NA	94.9762	NA	122.679	NA	111	NA	111	NA	73	NA
2018-11-15	98	3546.67	84.0848	NA	167.672	NA	98	9880	150	NA	98	NA	167.672	11526.7	98	14186.7	84.0848	NA	129.827	NA	167.672	NA	150	NA	150	NA	98	NA
2018-11-19	148	2913.33	125.657	NA	212.199	12666.7	148	12160	212	NA	148	NA	212.199	11146.7	148	NA	125.657	NA	173.992	NA	212.199	NA	212	21660	212	18240	148	NA
2018-11-22	187	4306.67	154.616	6460	247.892	8106.67	187	9880	259	NA	187	NA	247.892	11146.7	187	NA	154.616	NA	207.797	NA	247.892	NA	259	22926.7	259	18746.7	187	NA
2018-11-26	245	2913.33	198.554	5953.33	286.967	9373.33	245	10133.3	326	NA	245	16466.7	286.967	9373.33	245	10830	198.554	NA	250.523	NA	286.967	NA	326	19570	326	16720	245	NA
2018-11-29	287	3166.67	230.72	5700	324.066	8740	287	9626.67	384	22420	287	NA	324.066	8740	287	13173.3	230.72	16973.3	286.863	18620	324.066	12666.7	384	19760	384	19000	287	NA
2018-12-03	339	3673.33	274.131	5700	385.012	7853.33	339	6966.67	463	17670	339	14440	385.012	8106.67	339	10640	274.131	15200	344.319	15580	385.012	11780	463	14060	463	17860	339	19760
2018-12-06	411	2660	314.831	6713.33	400.973	8740	411	6713.33	535	14313.3	399	16720	400.973	7093.33	411	9880	314.831	16910	373.609	NA	400.973	11400	535	17226.7	535	18873.3	411	14566.7
2018-12-10	507	3546.67	332.114	6650	402.943	6206.67	507	6080	631	13173.3	432	NA	402.943	6333.33	507	9500	332.114	13680	381.461	NA	402.943	11653.3	631	14186.7	631	15200	507	19633.3
2018-12-13	579	3420	359.985	5066.67	413.541	5446.67	579	5320	703	12920	479	13300	413.541	6586.67	579	7980	359.985	NA	400.263	11400	413.541	10830	703	NA	703	13553.3	579	11906.7
2018-12-18	674	3040	406.581	4180	450.516	5193.33	674	4560	804	9626.67	551	16340	450.516	6206.67	674	7220	406.581	9880	442.812	9500	450.516	9500	804	NA	804	15326.7	674	11273.3
2018-12-21	721	2660	438.525	4560	481.28	4180	721	4686.67	861	9626.67	598	11020	481.28	5446.67	721	8360	438.525	10133.3	474.471	10006.7	481.28	8866.67	861	12920	861	16340	721	12160
2018-12-25	801	2533.33	478.861	4180	512.711	3166.67	801	5890	950	8993.33	651	11210	512.711	6333.33	801	8170	478.861	9120	512.295	8486.67	512.711	8233.33	950	11780	950	11146.7	801	11273.3
2018-12-29	897	2280	491.838	5193.33	514.135	8106.67	897	4560	1046	8360	678	11780	514.135	6586.67	897	7600	491.838	9246.67	518.034	8930	514.135	8550	1046	12793.3	1046	15200	897	10766.7
2019-01-02	993	3420	511.898	4180	517.235	5193.33	993	4813.33	1142	7346.67	714	11780	517.235	5826.67	993	6840	511.898	9120	527.379	9626.67	517.235	8550	1142	12160	1142	14693.3	993	9120
2019-01-05	1065	2280	539.317	4813.33	522.219	7220	1065	4813.33	1214	8613.33	761	9246.67	522.219	6840	1065	6460	539.317	7980	541.542	8740	522.219	8993.33	1214	9626.67	1214	13046.7	1065	8613.33
2019-01-08	1137	2786.67	572.131	4940	532.421	6460	1137	4560	1286	7093.33	813	7980	532.421	5700	1137	NA	572.131	8866.67	562.265	10386.7	532.421	9626.67	1286	11400	1286	12666.7	1137	10513.3
2019-01-11	1206	2408.4	602.367	4815.07	552.373	4941.74	1206	3928.4	1358	6335.07	862	7981.74	552.373	5068.4	1206	9501.74	602.367	7981.74	587.968	7601.74	552.373	8741.74	1358	10261.7	1358	12795.1	1206	8551.74
2019-01-15	1294	2174.33	639.494	3440.99	583.901	4327.66	1294	4074.33	1449	6227.66	922	6480.99	583.901	5467.66	1294	8760.99	639.494	8507.66	624.612	6734.33	583.901	7747.66	1449	9520.99	1449	10534.3	1294	8000.99
2019-01-18	1356	1930.78	665.246	4464.12	604.315	5350.78	1356	4084.12	1521	5984.12	957	5350.78	604.315	5224.12	1356	5730.78	665.246	7377.45	648.653	10670.8	604.315	6870.78	1521	8644.12	1521	11810.8	1356	7630.78
2019-01-22	1429	2505.32	709.066	3391.99	640.476	4025.32	1429	3771.99	1603	5418.66	1022	6178.66	640.476	5165.32	1429	6431.99	709.066	6938.66	690.164	8205.32	640.476	7698.66	1603	10738.7	1603	10612	1429	6685.32
2019-01-25	1487	2172.53	745.1	3565.87	668.14	3565.87	1487	4072.53	1666	5592.53	1080	5085.87	668.14	4832.53	1487	6099.2	745.1	6352.53	723.014	8125.87	668.14	6352.53	1666	7365.87	1666	11039.2	1487	8252.53
2019-01-29	1562	2068.9	795.754	3588.9	711.431	3335.56	1562	3588.9	1762	5108.9	1148	5108.9	711.431	4602.23	1562	5995.56	795.754	5868.9	772.837	6375.56	711.431	5615.56	1762	6628.9	1762	8782.23	1562	7768.9
2019-02-03	1670	2468.48	854.651	3228.48	745.429	3735.15	1670	3228.48	1877	4748.48	1231	4748.48	745.429	4748.48	1670	4495.15	854.651	5001.81	821.025	7788.48	745.429	6775.15	1877	8041.81	1877	11208.5	1670	9941.81
2019-02-07	1766	2215.15	896.016	3228.48	756.113	4241.81	1766	2975.15	1973	5508.48	1300	5128.48	756.113	3988.48	1766	3481.81	896.016	6141.81	845.926	7155.15	756.113	7028.48	1973	8168.48	1973	10448.5	1766	7218.48
2019-02-11	1862	3101.81	924.527	3355.15	762.325	3101.81	1862	3481.81	2069	4748.48	1352	4368.48	762.325	4558.48	1862	2975.15	924.527	4495.15	862.084	7788.48	762.325	7028.48	2069	7661.81	2069	9308.48	1862	10068.5
2019-02-15	1958	2468.48	956.164	3861.81	765.78	3228.48	1958	3988.48	2165	4875.15	1418	7788.48	765.78	5761.81	1958	4875.15	956.164	5255.15	875.132	5888.48	765.78	7028.48	2165	7661.81	2165	9308.48	1958	10068.5
2019-02-18	2022	1586.75	992.307	3360.08	790.667	3360.08	2022	2980.08	2237	4880.08	1470	3866.75	790.667	5133.41	2022	4246.75	992.307	5260.08	907.361	6273.41	790.667	6020.08	2237	8046.75	2237	9946.75	2022	7413.41
2019-02-21	2078	2266.29	1026.16	2772.96	820.051	3279.62	2078	2646.29	2299	4419.62	1516	NA	820.051	4926.29	2078	3406.29	1026.16	4292.96	940.909	9549.62	820.051	5939.62	2299	8726.29	2299	8726.29	2078	10373
2019-02-25	2126	1717.27	1061.77	3363.93	854.811	2730.6	2126	3110.6	2357	3743.93	1564	4503.93	854.811	3997.27	2126	3743.93	1061.77	4377.27	975.749	6783.93	854.811	6277.27	2357	7037.27	2357	7417.27	2126	8557.27
2019-02-28	2163	1986.78	1091.92	3380.11	885.038	2366.78	2163	3380.11	2404	4140.11	1601	6420.11	885.038	4266.78	2163	2746.78	1091.92	3886.78	1007.23	8066.78	885.038	6926.78	2404	6040.11	2404	7560.11	2163	11233.4
2019-03-05	2200	1637.5	1125.45	2904.17	929.543	3410.83	2200	2397.5	2453	3790.83	1638	4170.83	929.543	4044.17	2200	2650.83	1125.45	5437.5	1048.45	5690.83	929.543	4804.17	2453	7084.17	2453	6704.17	2200	9617.5
2019-03-08	2227	NA	1146	3139.01	956.381	3265.67	2227	2252.34	2488	3899.01	1665	3392.34	956.381	4659.01	2227	2125.67	1146	4659.01	1072.22	2632.34	956.381	6179.01	2488	5419.01	2488	6305.67	2227	7319.01
2019-03-12	2256	NA	1174.09	3337.54	996.612	3210.87	2256	NA	2533	3844.2	1694	4097.54	996.612	4984.2	2256	2830.87	1174.09	3464.2	1107.19	2324.2	996.612	6377.54	2533	5870.87	2533	6124.2	2256	8910.87
2019-03-15	2274	NA	1190.33	2931.23	1020.11	2677.89	2274	NA	2558	3944.56	1712	3944.56	1020.11	4957.89	2274	3564.56	1190.33	3057.89	1127.46	NA	1020.11	4831.23	2558	5591.23	2558	6477.89	2274	NA
2019-03-26	2317	NA	1227.59	NA	1094.72	NA	2317	NA	2626	NA	1755	NA	1094.72	NA	2317	NA	1227.59	NA	1184.86	NA	1094.72	NA	2626	NA	2626	NA	2317	NA
2019-11-08	17	4813.33	17.6766	NA	54.6941	25840	17	NA	37	NA	17	NA	54.6941	14820	17	14440	17.6766	NA	33.1987	NA	54.6941	NA	37	NA	37	NA	17	NA
2019-11-14	53	4180	45.1835	NA	102.193	NA	53	12350	85	NA	53	NA	102.193	12540	53	NA	45.1835	NA	72.3291	NA	102.193	NA	85	23180	85	NA	53	NA
2019-11-21	152	4053.33	123.607	7600	191.71	12666.7	152	9880	221	NA	152	NA	191.71	NA	152	NA	123.607	25080	160.79	NA	191.71	NA	221	25080	221	NA	152	NA
2019-11-28	271	4053.33	198.174	6333.33	252.796	10640	271	7790	348	NA	256	NA	252.796	11906.7	271	11400	198.174	18240	232.018	23560	252.796	15960	348	NA	348	23560	271	21280
2019-12-05	420	3040	290.961	6713.33	316.048	NA	420	6206.67	502	17290	402	16340	316.048	10133.3	420	NA	290.961	15960	313.144	NA	316.048	16340	502	17733.3	502	21406.7	420	16530
2019-12-12	575	3293.33	369.781	4560	364.107	9880	575	5320	663	12920	530	10450	364.107	7853.33	575	5320	369.781	12920	377.893	18240	364.107	12540	663	15200	663	15706.7	575	16720
2019-12-19	729	NA	467.068	4686.67	415.174	10133.3	729	5573.33	824	11146.7	669	10893.3	415.174	6966.67	729	6270	467.068	NA	454.053	12160	415.174	11590	824	NA	824	15453.3	729	10006.7
2019-12-26	892	3420	560.27	3800	459.575	4433.33	892	4180	992	9753.33	804	NA	459.575	7346.67	892	NA	560.27	NA	525.743	10133.3	459.575	9500	992	16150	992	12793.3	892	10260
2020-01-02	1057	3040	625.997	4306.67	495.992	3420	1057	4940	1160	7600	912	5446.67	495.992	6460	1057	8740	625.997	7600	578.829	6840	495.992	9690	1160	10766.7	1160	13173.3	1057	10386.7
2020-01-09	1204	2573.43	716.288	4220.1	558.618	3840.1	1204	4980.1	1318	6500.1	1035	5740.1	558.618	4726.77	1204	7640.1	716.288	NA	662.196	7893.43	558.618	7893.43	1318	11313.4	1318	12706.8	1204	12706.8
2020-01-15	1343	2959.27	787.401	3212.6	588.757	3465.93	1343	4225.93	1462	6252.6	1139	5365.93	588.757	5239.27	1343	6125.93	787.401	8975.93	712.447	6632.6	588.757	8025.93	1462	7265.93	1462	11825.9	1343	10305.9
2020-01-22	1501	2713.69	862.89	3220.35	635.506	4233.69	1501	4233.69	1630	4867.02	1255	4613.69	635.506	5120.35	1501	6893.69	862.89	6513.69	776.236	5247.02	635.506	7273.69	1630	9173.69	1630	11643.7	1501	NA
2020-01-29	1645	3135.54	944.345	3325.54	698.423	3515.54	1645	3895.54	1788	5668.87	1380	4655.54	698.423	6048.87	1645	5668.87	944.345	5795.54	852.052	4908.87	698.423	5922.21	1788	7315.54	1788	NA	1645	10228.9
2020-02-05	1794	3294.61	1023.29	2787.94	752.289	2787.94	1794	3294.61	1951	4687.94	1495	4687.94	752.289	4687.94	1794	5447.94	1023.29	5194.61	922.759	4561.28	752.289	5447.94	1951	7854.61	1951	12097.9	1794	7347.94
2020-02-12	1917	2951.99	1080.9	2951.99	799.208	2951.99	1917	3205.32	2089	4091.99	1584	3711.99	799.208	NA	1917	NA	1080.9	5105.32	973.92	3458.65	799.208	6118.65	2089	7511.99	2089	11058.7	1917	9031.99
2020-02-19	2042	2287.8	1164.71	2287.8	866.717	2287.8	2042	4187.8	2233	3807.8	1706	3807.8	866.717	3807.8	2042	NA	1164.71	5327.8	1051.72	3934.47	866.717	5707.8	2233	6214.47	2233	9887.8	2042	NA
2020-02-26	2132	2508.11	1237	2508.11	961.765	2508.11	2132	2508.11	2349	3014.78	1796	5041.44	961.765	4028.11	2132	5168.11	1237	4408.11	1140.64	3014.78	961.765	4408.11	2349	5928.11	2349	8081.44	2132	NA
2020-03-04	2248	2257.12	1323.77	2637.12	1054.84	4030.46	2248	2637.12	2484	3650.46	1912	3143.79	1054.84	3397.12	2248	5297.12	1323.77	4727.12	1238.03	3397.12	1054.84	4157.12	2484	5297.12	2484	6943.79	2248	9477.12
2020-03-11	2314	NA	1378.13	3342.78	1130.88	2329.45	2314	1949.45	2573	3089.45	1978	3849.45	1130.88	3596.11	2314	3849.45	1378.13	3849.45	1303.71	2329.45	1130.88	4989.45	2573	3849.45	2573	7016.11	2314	NA
2020-03-18	2367	NA	1422.08	NA	1190.52	NA	2367	NA	2640	NA	2031	3995.65	1190.52	2855.65	2367	5515.65	1422.08	5135.65	1358.31	NA	1190.52	3995.65	2640	4755.65	2640	5262.32	2367	NA
2020-03-25	2375	NA	1431.27	NA	1221.22	NA	2375	NA	2660	NA	2039	NA	1221.22	NA	2375	NA	1431.27	NA	1376.97	NA	1221.22	NA	2660	4334.26	2660	4334.26	2375	4334.26
2020-04-01	2399	NA	1452.82	NA	1267.61	NA	2399	NA	2699	NA	2063	NA	1267.61	NA	2399	NA	1452.82	NA	1410.16	NA	1267.61	NA	2699	NA	2699	NA	2399	NA
2020-04-08	2419	NA	1468.63	NA	1305.2	NA	2419	NA	2732	NA	2083	NA	1305.2	NA	2419	NA	1468.63	NA	1437.75	NA	1305.2	NA	2732	NA	2732	NA	2419	NA
The values in CA are the chilling accumulation (h) . The values in FR are the forcing requirement (°C h) averaged from 3 twigs. NA represents that the flowering or leaf-out was not observed in the experiment.
